# Supplementary material for: Spectral Characteristics of Beached Sargassum in Response to Drying and Decay over Time
Source: MDPI journal article supplement (doi:10.3390/rs15174336), 2023-09-02
Supplement: s1 [file s1]

Archive with 1 entries (1 files):
- remotesensing-2435001-supplementary.pdf
